# Supplementary material for: Taxonomy and biogeography of the Nearctic Raphia Hübner (Lepidoptera, Noctuidae, Raphiinae)
Source: Zookeys. 2014 Jun 27;(421):91–113. doi: 10.3897/zookeys.421.7517 (PMC4109472; doi:10.3897/zookeys.421.7517)
Supplement: Supplementary material 1 — Table S1. Specimen data for mtDNA barcode vouchers. [file zookeys-421-091-s001.xlsx]

## Sheet: Sheet1
Taxon	Haplogrp. #	DNA voucher #	GenBank #	Locality	Lat	Lon	Date	Collector	Deposited
Raphia hybris	n.a.	CNCLEP 069739	-	Spain: Andalusia: Grenada, Los Olmos			2003-06-23	H. Rietz	CNC
Raphia f. frater / coloradensis	1	UASM58513	KJ394312	CAN: AB: Red Deer R., bridge E of Jenner	50.644	-111.154	14-Jun-2005	G. G. Anweiler	UASM
Raphia f. frater / coloradensis	1	UASM77836	KJ389170	CAN: AB: Red Deer R., bridge N. of Buffalo	50.849	-110.697	16-Jun-2005	G. G. Anweiler	UASM
Raphia f. frater / coloradensis	1	08-JDWBC-3687	-	CAN: AB: Waterton Lakes N. P., Belly River cmpgd.	49.026	-113.685	2005-07-07	B. C. Schmidt	UASM
Raphia f. frater / coloradensis	1	UASM41465	KJ382361	CAN: AB: Waterton Lakes N. P., Belly River cmpgd.	49.026	-113.685	11-Jul-2005	G. G. Anweiler	UASM
Raphia f. frater / coloradensis	1	UASM41455	KJ386683	CAN: AB: Waterton Lakes N. P., Belly River cmpgd.	49.026	-113.685	07-Jul-2005	G. G. Anweiler	UASM
Raphia f. frater / coloradensis	1	UASM41454	KJ389043	CAN: AB: Waterton Lakes N. P., Belly River cmpgd.	49.026	-113.685	07-Jul-2005	G. G. Anweiler	UASM
Raphia f. frater / coloradensis	1	UASM41456	KJ391873	CAN: AB: Waterton Lakes N. P., Belly River cmpgd.	49.026	-113.685	07-Jul-2005	G. G. Anweiler	UASM
Raphia f. frater / coloradensis	1	UASM41453	KJ392557	CAN: AB: Waterton Lakes N. P., Belly River cmpgd.	49.026	-113.685	07-Jul-2005	G. G. Anweiler	UASM
Raphia f. frater / coloradensis	1	08BBLEP-03839	KJ381389	CAN: AB: Waterton Lakes N. P., Carthew Ck.	49.049	-113.913	25-Jul-2008	BIO bus 2008	BIO
Raphia f. frater / coloradensis	1	08BBLEP-03877	KJ382630	CAN: AB: Waterton Lakes N. P., Carthew Ck.	49.049	-113.913	25-Jul-2008	BIO bus 2008	BIO
Raphia f. frater / coloradensis	1	08BBLEP-03871	KJ392339	CAN: AB: Waterton Lakes N. P., Carthew Ck.	49.049	-113.913	25-Jul-2008	BIO bus 2008	BIO
Raphia f. frater / coloradensis	1	08BBLEP-03755	KJ385548	CAN: AB: Waterton Lakes N. P., Coppermine Ck.	49.104	-113.959	27-Jul-2008	BIO bus 2008	BIO
Raphia f. frater / coloradensis	1	08BBLEP-02327	KJ385019	CAN: AB: Waterton Lakes N. P., townsite cmpgd.	49.045	-113.913	21-Jul-2008	BIO bus 2008	BIO
Raphia f. frater / coloradensis	1	08BBLEP-03640	KJ387901	CAN: AB: Waterton Lakes N. P., townsite cmpgd.	49.045	-113.913	21-Jul-2008	BIO bus 2008	BIO
Raphia f. frater / coloradensis	1	08BBLEP-03271	KJ393321	CAN: AB: Waterton Lakes N. P., townsite cmpgd.	49.045	-113.913	23-Jul-2008	BIO bus 2008	BIO
Raphia frater coloradensis	1	CNCNoctuoidea10110	KJ392359	CAN: AB: Writing-On-Stone P. P.	49.083	-111.617	28-Jun-2000	J. Troubridge	CNC
Raphia frater coloradensis	1	CNCNoctuoidea10115	KJ392721	CAN: AB: Writing-On-Stone P. P.	49.083	-111.617	28-Jun-2000	J. Troubridge	CNC
Raphia frater frater	1	10BBCLP-1774	JF842764	CAN: AB: Elk Island N. P., staff housing area	53.684	-112.863	08-Aug-2010	BIO bus 2010	BIO
Raphia frater frater	1	10BBCLP-1775	JF842765	CAN: AB: Elk Island N. P., staff housing area	53.684	-112.863	08-Aug-2010	BIO bus 2010	BIO
Raphia frater frater	1	10BBCLP-1773	JF842763	CAN: AB: Elk Island N. P., Tawayik Lake Picnic Area	53.618	-112.875	09-Aug-2010	BIO bus 2010	BIO
Raphia frater elbea	4	CNCLEP00054498	-	USA: AZ: Patagonia	31.5394	-110.756	26-Mar-2006	B. Walsh	CNC
Raphia frater elbea	4	CNCLEP00054408	GU679166	USA: AZ: Pima Co., Empire Cienaga	31.7853	-110.642	15-May-2004	B. Walsh	CNC
Raphia frater elbea	4	CNCLEP00054410	GU679167	USA: AZ: Pima Co., Empire Cienaga	31.7853	-110.642	13-Jun-2004	B. Walsh	CNC
Raphia frater elbea	4	CNCLEP00054499	-	USA: AZ: Pima Co., Prison Camp Rd.	32.4303	-110.705	07-May-2006	B. Walsh	CNC
Raphia frater elbea	4	CNCLEP00054409	HM382030	USA: AZ: Santa Cruz Co., 3mi. W of Patagonia	31.5394	-110.756	23-Feb-2003	B. Walsh	CNC
Raphia f. frater / coloradensis	1	CNCNoctuoidea10112	KJ388608	CAN: BC: Mount Kobau	49.1	-119.65	04-Aug-1999	J. Troubridge	CNC
Raphia frater frater	1	AVBC 1054-11	KJ386475	CAN: BC: Cariboo Dist., Williams Lake	52.118	-122.118	20-Jul-2011	L. Avis	BIO
Raphia frater frater	1	HLC-23104	KJ384934	CAN: BC: Golden, Golden-Donald Upper Rd.	51.3719	-116.982	04-Aug-2005	K. Pickthorn & S. Dixon	BIO
Raphia frater frater	1	10-JDWBC-5603	HM867664	CAN: BC: Okanagan Falls, Mahoney Lake East, OFM11	49.285	-119.586	19-Jun-2009	J. R. deWaard	BIO
Raphia frater frater	1	UBC-2006-1059	KJ387400	CAN: BC: Pitt Meadows	49.269	-122.641	18-Jul-2006	A. Li, J. Derhousoff	PFC
Raphia frater frater	1	10BBCLP-1776	JF842766	CAN: BC: Revelstoke, Revelstoke KOA cmpgd.	50.992	-118.157	11-Jul-2010	BIO bus 2010	BIO
Raphia frater frater	1	PFC-2006-0821	KJ383898	CAN: BC: Saanich, Prospect Lake, Echo Dr.	48.515	-123.435	20-Jul-2006	L Mavin & M Young	PFC
Raphia frater frater	1	PFC-2006-0822	KJ393762	CAN: BC: Saanich, Prospect Lake, Echo Dr.	48.515	-123.435	20-Jul-2006	L Mavin & M Young	PFC
Raphia frater cinderella	3	acrorev144	-	USA: CA: Solano Co., , 9 mi W. Winters	38.511	-122.031	23-Jun-2009	J. de Benedictis	CNC
Raphia frater cinderella	5	08-JDWBC-3683	-	USA: CA: Ventura Co., Sespe Ck. at Derrydale Ck.	34.584	-119.262	2001-04-24	T. Dimmock	UASM
Raphia frater cinderella	5	08-JDWBC-3684	-	USA: CA: Ventura Co., Sespe Ck. at Derrydale Ck.	34.584	-119.262	2001-04-24	T. Dimmock	UASM
Raphia frater cinderella	5	08-JDWBC-3686	-	USA: CA: Ventura Co., Sespe Ck. at Derrydale Ck.	34.584	-119.262	2001-04-24	T. Dimmock	UASM
Raphia frater coloradensis	5	acrorev143	-	USA: CA: Sierra Co. 2 mi E Bassetts, Hwy 49	39.625	-120.577	15-Jul-2009	P. A. & E. Opler	CNC
Raphia frater coloradensis	5	acrorev145	-	USA: CA: Sierra Co. 2 mi E Bassetts, Hwy 49	39.625	-120.577	15-Jul-2009	P. A. & E. Opler	CNC
Raphia frater coloradensis	5	LEP037817	-	USA: CA: Sierra Co. 2 mi E Bassetts, Hwy 49	39.625	-120.577	15-Jul-2009	P. A. & E. Opler	CNC
Raphia frater coloradensis	1	acrorev148	-	USA: CO: Mesa Co., Colorado N. M., W entrance	39.066	-108.777	26-Apr-1996	P. A. Opler	CNC
Raphia frater frater	1	05-CTATBI-0047	-	USA: CT: Hartford Co., East Hartford	41.757	-72.653	03-Jun-2005		BIO
Raphia frater frater	1	05-CTATBI-0225	-	USA: CT: Hartford Co., East Hartford	41.757	-72.653	03-Jun-2005		BIO
Raphia frater abrupta	1	UASM99792	GU679215	USA: KS: Crawford Co., Frontenac	37.455	-94.702		G. A. Salsbury	CNC
Raphia frater abrupta	1	UASM99791	GU679208	USA: KS: Pottawatomie Co., Fishing Lake Nr. 1	39.3333	-96.3	26-Apr-2003	J. Metlevski	CNC
Raphia frater abrupta	1	UASM99789	GU679210	USA: KS: Riley Co., Konza Prairie Biol. Station	39.112	-96.606	18-Apr-2003	J. Metlevski	CNC
Raphia frater abrupta	1	UASM99790	GU679211	USA: KS: Riley Co., Konza Prairie Biol. Station	39.105	-96.596	01-Aug-2003	J. Metlevski	CNC
Raphia frater abrupta	1	UASM99787	GU679212	USA: KS: Riley Co., Konza Prairie Biol. Station	39.088	-96.585	12-Jul-2003	J. Metlevski	CNC
Raphia frater abrupta	1	UASM99788	GU679213	USA: KS: Riley Co., Konza Prairie Biol. Station	39.105	-96.596	20-Jul-2003	J. Metlevski	CNC
Raphia frater frater	1	08BBLEP-00836	KJ383551	CAN: MB: Bird Hill P. P.	49.999	-96.876	04-Jul-2008	J.Sones et al.	BIO
Raphia frater frater	1	08BBLEP-01147	KJ383265	CAN: MB: Riding Mountain N. P., Wasagaming cmpgd.	50.656	-99.962	08-Jul-2008	BIO bus 2008	BIO
Raphia frater frater	1	08BBLEP-01072	KJ383874	CAN: MB: Riding Mountain N. P., Wasagaming cmpgd.	50.65	-99.94	06-Jul-2008	BIO bus 2008	BIO
Raphia frater frater	1	08BBLEP-01433	KJ385303	CAN: MB: Riding Mountain N. P., Wasagaming cmpgd.	50.66	-99.853	09-Jul-2008	BIO bus 2008	BIO
Raphia frater frater	1	08BBLEP-01128	KJ385386	CAN: MB: Riding Mountain N. P., Wasagaming cmpgd.	50.656	-99.962	08-Jul-2008	BIO bus 2008	BIO
Raphia frater frater	1	08BBLEP-01123	KJ387795	CAN: MB: Riding Mountain N. P., Wasagaming cmpgd.	50.656	-99.962	08-Jul-2008	BIO bus 2008	BIO
Raphia frater frater	1	08BBLEP-01116	KJ390494	CAN: MB: Riding Mountain N. P., Wasagaming cmpgd.	50.656	-99.962	08-Jul-2008	BIO bus 2008	BIO
Raphia frater frater	1	08BBLEP-01070	KJ392495	CAN: MB: Riding Mountain N. P., Wasagaming cmpgd.	50.65	-99.94	06-Jul-2008	BIO bus 2008	BIO
Raphia frater frater	3	08BBLEP-00860	KJ384819	CAN: MB: Bird Hill P. P.	49.999	-96.876	04-Jul-2008	J.Sones et al.	BIO
Raphia frater frater	3	08BBLEP-00876	KJ385481	CAN: MB: Bird Hill P. P.	49.999	-96.876	04-Jul-2008	J.Sones et al.	BIO
Raphia frater frater	3	08BBLEP-00857	KJ386304	CAN: MB: Bird Hill P. P.	49.999	-96.876	04-Jul-2008	J.Sones et al.	BIO
Raphia frater frater	3	08BBLEP-00827	KJ386611	CAN: MB: Bird Hill P. P.	49.999	-96.876	04-Jul-2008	J.Sones et al.	BIO
Raphia frater frater	3	08BBLEP-00864	KJ392838	CAN: MB: Bird Hill P. P.	49.999	-96.876	04-Jul-2008	J.Sones et al.	BIO
Raphia frater frater	3	08BBLEP-00841	KJ393544	CAN: MB: Bird Hill P. P.	49.999	-96.876	04-Jul-2008	J.Sones et al.	BIO
Raphia frater abrupta	1		KF492079	USA: MD: Prince Georges Co., Ft. Meade			1994-08-03	C. Mitter	GenBank
Raphia frater frater	1	05-NBSTA-533	GU095370	CAN: NB: Charlotte Co., St. Andrews	45.0833	-67.0667	08-Aug-2005	J. Ballantyne	BIO
Raphia frater frater	1	05-NBSTA-241	GU095371	CAN: NB: Charlotte Co., St. Andrews	45.0833	-67.0667	01-Aug-2005	J. Ballantyne	BIO
Raphia frater frater	1	05-NBSTA-240	GU095372	CAN: NB: Charlotte Co., St. Andrews	45.0833	-67.0667	01-Aug-2005	J. Ballantyne	BIO
Raphia frater frater	1	05-NBSTA-098	GU095373	CAN: NB: Charlotte Co., St. Andrews	45.0833	-67.0667	29-Jul-2005	J. Ballantyne	BIO
Raphia frater frater	1	05-NBSTA-097	GU095374	CAN: NB: Charlotte Co., St. Andrews	45.0833	-67.0667	29-Jul-2005	J. Ballantyne	BIO
Raphia frater frater	1	05-NBSTA-216	GU095375	CAN: NB: Charlotte Co., St. Andrews	45.0833	-67.0667	31-Jul-2005	J. Ballantyne	BIO
Raphia frater frater	1	05-NBSTA-165	GU095376	CAN: NB: Charlotte Co., St. Andrews	45.0833	-67.0667	30-Jul-2005	J. Ballantyne	BIO
Raphia frater frater	1	05-NBSTA-217	GU095377	CAN: NB: Charlotte Co., St. Andrews	45.0833	-67.0667	31-Jul-2005	J. Ballantyne	BIO
Raphia frater frater	1	05-NBSTA-312	GU095378	CAN: NB: Charlotte Co., St. Andrews	45.0833	-67.0667	03-Aug-2005	J. Ballantyne	BIO
Raphia frater frater	1	Moth 445.03SA	GU438622	CAN: NB: Charlotte Co., St. Andrews	45.0833	-67.0667	15-Jul-2003	P. Hebert	BIO
Raphia frater frater	1	Moth 464.03SA	GU438623	CAN: NB: Charlotte Co., St. Andrews	45.0833	-67.0667	15-Jul-2003	P. Hebert	BIO
Raphia frater frater	1	moth138.02SA	GU438624	CAN: NB: Charlotte Co., St. Andrews	45.0833	-67.0667	19-Jul-2002	P. Hebert	BIO
Raphia frater frater	1	moth221.02SA	GU438625	CAN: NB: Charlotte Co., St. Andrews	45.0833	-67.0667	20-Jul-2002	P. Hebert	BIO
Raphia frater frater	1	04HBL007566	GU438626	CAN: NB: Charlotte Co., St. Andrews	45.0833	-67.0667	18-Jul-2002	P. Hebert	BIO
Raphia frater frater	1	04HBL00827	GU438627	CAN: NB: Charlotte Co., St. Andrews	45.0833	-67.0667	03-Jul-2004	P. Hebert	BIO
Raphia frater frater	1	04HBL00828	GU438628	CAN: NB: Charlotte Co., St. Andrews	45.0833	-67.0667	03-Jul-2004	P. Hebert	BIO
Raphia frater frater	1	04HBL007618	GU438629	CAN: NB: Charlotte Co., St. Andrews	45.0833	-67.0667	19-Jul-2002	P. Hebert	BIO
Raphia frater frater	1	04HBL007621	GU438630	CAN: NB: Charlotte Co., St. Andrews	45.0833	-67.0667	19-Jul-2002	P. Hebert	BIO
Raphia frater frater	1	09BBELE-1518	HM415327	CAN: NB: Maple Grove	45.582	-64.986	07-Aug-2009	BIO bus 2009	BIO
Raphia frater frater	1	MNBTT-1086	KJ382555	CAN: NB: Sunbury Co., Acadia Research Forest	46	-66.18	22-Jul-2002	A. W. Thomas	BIO
Raphia frater frater	1	MNBTT-1088	KJ387076	CAN: NB: Sunbury Co., Acadia Research Forest	46	-66.18	22-Jul-2002	A. W. Thomas	BIO
Raphia frater frater	1	MNBTT-1085	KJ389093	CAN: NB: Sunbury Co., Acadia Research Forest	46	-66.18	27-Jun-2000	A. W. Thomas	BIO
Raphia frater frater	1	MNBTT-317	KJ386045	CAN: NB: York Co., Fredericton	45.85	-67.7	14-Jul-2005	A. W. Thomas	BIO
Raphia frater frater	1	MNBTT-315	KJ386855	CAN: NB: York Co., Fredericton	45.85	-67.7	14-Jul-2005	A. W. Thomas	BIO
Raphia frater frater	1	MNBTT-316	KJ392968	CAN: NB: York Co., Fredericton	45.85	-67.7	22-Jul-2005	A. W. Thomas	BIO
Raphia frater frater	1	MNBTT-1089	KJ387854	CAN: NB: York Co., North Lake	45.49	-67.44	17-Jun-2000	A. W. Thomas	BIO
Raphia frater frater	1	MNBTT-1087	KJ391461	CAN: NB: York Co., North Lake	45.49	-67.44	17-Jun-2000	A. W. Thomas	BIO
Raphia frater frater	1	MNBTT-1090	KJ392234	CAN: NB: York Co., North Lake	45.49	-67.44	17-Jun-2000	A. W. Thomas	BIO
Raphia frater frater	1	MNBTT-1091	KJ393152	CAN: NB: York Co., North Lake	45.49	-67.44	17-Jun-2000	A. W. Thomas	BIO
Raphia frater coloradensis	1	acrorev152	-	USA: NM: Bernalillo Co., Albuquerque	35.086	-106.627	20-Jun-2007	R. Holland	CNC
Raphia frater coloradensis	1	acrorev153	-	USA: NM: Bernalillo Co., Albuquerque	35.086	-106.627	23-Jun-2007	R. Holland	CNC
Raphia frater coloradensis	1	CNCLEP 79878	-	USA: NM: Eddy Co., Carlsbad Caverns N. P.	32.062	-104.337	14-Jun-2007	E. H. Metzler	CNC
Raphia frater coloradensis	1	CNCLEP 79874	-	USA: NM: Eddy Co., Carlsbad Caverns N. P.	32.066	-104.283	06-Aug-2010	E. H. Metzler	CNC
Raphia frater coloradensis	1	acrorev149	-	USA: NM: Socorro Co., Las Nutrias	34.447	-106.771	17-Jun-2006	Holland & Romero	CNC
Raphia frater coloradensis	1	acrorev150	-	USA: NM: Socorro Co., Las Nutrias	34.447	-106.771	17-Jun-2006	Holland & Romero	CNC
Raphia frater coloradensis	1	acrorev151	-	USA: NM: Socorro Co., Las Nutrias	34.447	-106.771	17-Jun-2006	Holland & Romero	CNC
Raphia frater elbea	4	CNCLEP 69766	-	USA: NM: Grant Co., 30 km WNW of Silver City	32.5	-108.35	11-Apr-2007		CNC
Raphia frater elbea	4	CNCLEP 69767	-	USA: NM: Grant Co., 30 km WNW of Silver City	32.5	-108.35	11-Apr-2007	C. D. Ferris	CNC
Raphia frater elbea	4	acrorev146	-	USA: NM: Grant Co., Mimbres Mtns, Spring Canyon	32.903	-107.819	26-Jul-2009	C. D. Ferris	CNC
Raphia frater elbea	4	acrorev147	-	USA: NM: Grant Co., Pitchfork Ranch	32.414	-108.351	28-Jul-2009	C. D. Ferris	CNC
Raphia frater frater	1	09BBELE-0626	HM414917	CAN: NS: Cape Breton Highlands, Black Brook	46.779	-60.333	21-Jul-2009	BIO bus 2009	BIO
Raphia frater frater	1	09BBELE-0635	HM414926	CAN: NS: Cape Breton Highlands, Black Brook	46.779	-60.333	21-Jul-2009	BIO bus 2009	BIO
Raphia frater frater	1	09BBELE-0640	HM414931	CAN: NS: Cape Breton Highlands, Black Brook	46.779	-60.333	21-Jul-2009	BIO bus 2009	BIO
Raphia frater frater	1	09BBELE-1159	HM414975	CAN: NS: Cape Breton Highlands, Black Brook	46.779	-60.333	21-Jul-2009	BIO bus 2009	BIO
Raphia frater frater	1	09BBELE-1186	HM415001	CAN: NS: Cape Breton Highlands, Black Brook	46.779	-60.333	21-Jul-2009	BIO bus 2009	BIO
Raphia frater frater	1	09BBELE-1228	HM415042	CAN: NS: Cape Breton Highlands, Black Brook	46.779	-60.333	21-Jul-2009	BIO bus 2009	BIO
Raphia frater frater	1	09BBELE-1232	HM415046	CAN: NS: Cape Breton Highlands, Black Brook	46.779	-60.333	21-Jul-2009	BIO bus 2009	BIO
Raphia frater frater	1	09BBELE-1236	HM415050	CAN: NS: Cape Breton Highlands, Black Brook	46.779	-60.333	21-Jul-2009	BIO bus 2009	BIO
Raphia frater frater	1	09BBELE-1245	HM415059	CAN: NS: Cape Breton Highlands, Black Brook	46.779	-60.333	21-Jul-2009	BIO bus 2009	BIO
Raphia frater frater	1	09BBELE-1246	HM415060	CAN: NS: Cape Breton Highlands, Black Brook	46.779	-60.333	21-Jul-2009	BIO bus 2009	BIO
Raphia frater frater	1	09BBELE-1134	HM436374	CAN: NS: Cape Breton Highlands, Black Brook	46.779	-60.333	21-Jul-2009	BIO bus 2009	BIO
Raphia frater frater	1	09BBELE-0189	GU690349	CAN: NS: Kejimkujik, Grafton Woods	44.383	-65.204	31-Jul-2009	BIO bus 2009	BIO
Raphia frater frater	1	09BBELE-0188	GU690352	CAN: NS: Kejimkujik, Grafton Woods	44.383	-65.204	31-Jul-2009	BIO bus 2009	BIO
Raphia frater coloradensis	1	CNCNoctuoidea10113	-	USA: NV: 11 mi SW Wells	41.0267	-115.085	23-Jul-2001	D. Lafontaine and J. Troubridge	CNC
Raphia frater abrupta	1	CNCNoctuoidea12276	-	USA: OK: Comanche Co., Ft. Sill, Medicine Bluff	34.687	-98.415	18-Jul-2003	M. C. Garhart	CNC
Raphia frater frater	1	PPBP-1612	KJ382756	CAN: ON: Bruce Peninsula N. P., Cyprus Lake gatehouse	45.23	-81.53	15-Jun-2008	BIO bus 2008	BIO
Raphia frater frater	1	PPBP-1604	KJ384691	CAN: ON: Bruce Peninsula N. P., Cyprus Lake gatehouse	45.23	-81.53	15-Jun-2008	BIO bus 2008	BIO
Raphia frater frater	1	PPBP-1377	KJ386620	CAN: ON: Bruce Peninsula N. P., Cyprus Lake gatehouse	45.23	-81.53	14-Jun-2008	BIO bus 2008	BIO
Raphia frater frater	1	PPBP-1311	KJ386725	CAN: ON: Bruce Peninsula N. P., Cyprus Lake gatehouse	45.23	-81.53	12-Jun-2008	BIO bus 2008	BIO
Raphia frater frater	1	PPBP-1611	KJ389593	CAN: ON: Bruce Peninsula N. P., Cyprus Lake gatehouse	45.23	-81.53	15-Jun-2008	BIO bus 2008	BIO
Raphia frater frater	1	PPBP-1318	KJ392366	CAN: ON: Bruce Peninsula N. P., Cyprus Lake gatehouse	45.23	-81.53	12-Jun-2008	BIO bus 2008	BIO
Raphia frater frater	1	PPBP-1317	KJ393350	CAN: ON: Bruce Peninsula N. P., Cyprus Lake gatehouse	45.23	-81.53	12-Jun-2008	BIO bus 2008	BIO
Raphia frater frater	1	PPBP-1606	KJ393862	CAN: ON: Bruce Peninsula N. P., Cyprus Lake gatehouse	45.23	-81.53	15-Jun-2008	BIO bus 2008	BIO
Raphia frater frater	1	PPBP-1448	KJ382337	CAN: ON: Bruce Peninsula N. P., Cyprus Lake info booth	45.19	-81.56	14-Jun-2008	BIO bus 2008	BIO
Raphia frater frater	1	PPBP-1444	KJ385438	CAN: ON: Bruce Peninsula N. P., Cyprus Lake info booth	45.19	-81.56	14-Jun-2008	BIO bus 2008	BIO
Raphia frater frater	1	PPBP-1441	KJ388737	CAN: ON: Bruce Peninsula N. P., Cyprus Lake info booth	45.19	-81.56	14-Jun-2008	BIO bus 2008	BIO
Raphia frater frater	1	PPBP-1449	KJ394307	CAN: ON: Bruce Peninsula N. P., Cyprus Lake info booth	45.19	-81.56	14-Jun-2008	BIO bus 2008	BIO
Raphia frater frater	1	08BBLEP-00119	KJ384714	CAN: ON: Goulais R., beach on Lake Superior	46.849	-84.372	28-Jun-2008	J.Cossey et al.	BIO
Raphia frater frater	1	08BBLEP-00017	KJ385909	CAN: ON: Goulais R., beach on Lake Superior	46.849	-84.372	28-Jun-2008	J.Cossey et al.	BIO
Raphia frater frater	1	08BBLEP-00091	KJ390106	CAN: ON: Goulais R., beach on Lake Superior	46.849	-84.372	28-Jun-2008	J.Cossey et al.	BIO
Raphia frater frater	1	08OEC-209	KJ386592	CAN: ON: Kawartha dist., Oliver Ecological Centre	44.564	-78.505	26-May-2008	J.Cossey et al.	BIO
Raphia frater frater	1	08OEC-219	KJ391261	CAN: ON: Kawartha dist., Oliver Ecological Centre	44.564	-78.505	26-May-2008	J.Cossey et al.	BIO
Raphia frater frater	1	08BBLEP-00364	KJ387584	CAN: ON: Pukaskwa N. P., cmpgd.	48.59	-86.29	29-Jun-2008	BIO bus 2008	BIO
Raphia frater frater	1	08BBLEP-00621	KJ385329	CAN: ON: Pukaskwa N. P., entrance rd.	48.592	-86.289	02-Jul-2008	BIO bus 2008	BIO
Raphia frater frater	1	08BBLEP-00244	KJ385680	CAN: ON: Pukaskwa N. P., entrance rd.	48.592	-86.289	30-Jun-2008	BIO bus 2008	BIO
Raphia frater frater	1	08BBLEP-00627	KJ390307	CAN: ON: Pukaskwa N. P., entrance rd.	48.592	-86.289	02-Jul-2008	BIO bus 2008	BIO
Raphia frater frater	1	08BBLEP-00661	KJ385142	CAN: ON: Pukaskwa N. P., visitor centre	48.59	-86.29	02-Jul-2008	BIO bus 2008	BIO
Raphia frater frater	1	CNCNoctuoidea10111	KJ394258	CAN: ON: Stittsville	45.2	-76.967	02-Jul-2003	J. Troubridge	CNC
Raphia frater frater	1	2005-ONT-304	GU092053	CAN: ON: Wellington Co., Puslinch Twp., Concession 11	43.537	-80.134	10-Jun-2005	P. Hebert	BIO
Raphia frater frater	1	Moth4086.03	GU092607	CAN: ON: Wellington Co., Puslinch Twp., Concession 11	43.537	-80.134	15-Apr-2003	P. Hebert	BIO
Raphia frater frater	1	Moth4456.03	GU092608	CAN: ON: Wellington Co., Puslinch Twp., Concession 11	43.537	-80.134	15-Apr-2003	P. Hebert	BIO
Raphia frater frater	1	Moth4435.03	GU092609	CAN: ON: Wellington Co., Puslinch Twp., Concession 11	43.537	-80.134	15-Apr-2003	P. Hebert	BIO
Raphia frater frater	1	Moth4445.03	GU092610	CAN: ON: Wellington Co., Puslinch Twp., Concession 11	43.537	-80.134	15-Apr-2003	P. Hebert	BIO
Raphia frater frater	1	Moth4454.03	GU092611	CAN: ON: Wellington Co., Puslinch Twp., Concession 11	43.537	-80.134	15-Apr-2003	P. Hebert	BIO
Raphia frater frater	1	Moth4458.03	GU092612	CAN: ON: Wellington Co., Puslinch Twp., Concession 11	43.537	-80.134	15-Apr-2003	P. Hebert	BIO
Raphia frater frater	1	04HBL005399	GU094282	CAN: ON: Wellington Co., Puslinch Twp., Concession 11	43.537	-80.134	14-Jun-2004	P. Hebert	BIO
Raphia frater frater	1	04HBL005356	GU094283	CAN: ON: Wellington Co., Puslinch Twp., Concession 11	43.537	-80.134	11-Jun-2004	P. Hebert	BIO
Raphia frater frater	1	04HBL005321	GU094284	CAN: ON: Wellington Co., Puslinch Twp., Concession 11	43.537	-80.134	10-Jun-2004	P. Hebert	BIO
Raphia frater frater	1	04HBL005108	GU094285	CAN: ON: Wellington Co., Puslinch Twp., Concession 11	43.537	-80.134	11-Jul-2004	P. Hebert	BIO
Raphia frater frater	1	04HBL005142	GU094286	CAN: ON: Wellington Co., Puslinch Twp., Concession 11	43.537	-80.134	13-Jul-2004	P. Hebert	BIO
Raphia frater frater	1	04HBL005153	GU094287	CAN: ON: Wellington Co., Puslinch Twp., Concession 11	43.537	-80.134	13-Jul-2004	P. Hebert	BIO
Raphia frater frater	1	04HBL005567	GU094288	CAN: ON: Wellington Co., Puslinch Twp., Concession 11	43.537	-80.134	18-Jun-2004	P. Hebert	BIO
Raphia frater frater	1	04HBL005256	GU094289	CAN: ON: Wellington Co., Puslinch Twp., Concession 11	43.537	-80.134	08-Jun-2004	P. Hebert	BIO
Raphia frater frater	1	04HBL005596	GU094290	CAN: ON: Wellington Co., Puslinch Twp., Concession 11	43.537	-80.134	19-Jun-2004	P. Hebert	BIO
Raphia frater frater	3	PPBP-1511	KJ382043	CAN: ON: Bruce Peninsula N. P., Cyprus Lake gatehouse	45.23	-81.53	15-Jun-2008	BIO bus 2008	BIO
Raphia frater frater	3	PPBP-1379	KJ382489	CAN: ON: Bruce Peninsula N. P., Cyprus Lake gatehouse	45.23	-81.53	14-Jun-2008	BIO bus 2008	BIO
Raphia frater frater	3	PPBP-1376	KJ383128	CAN: ON: Bruce Peninsula N. P., Cyprus Lake gatehouse	45.23	-81.53	14-Jun-2008	BIO bus 2008	BIO
Raphia frater frater	3	PPBP-1320	KJ386097	CAN: ON: Bruce Peninsula N. P., Cyprus Lake gatehouse	45.23	-81.53	12-Jun-2008	BIO bus 2008	BIO
Raphia frater frater	3	PPBP-1314	KJ388201	CAN: ON: Bruce Peninsula N. P., Cyprus Lake gatehouse	45.23	-81.53	12-Jun-2008	BIO bus 2008	BIO
Raphia frater frater	3	PPBP-1445	KJ385357	CAN: ON: Bruce Peninsula N. P., Cyprus Lake info booth	45.19	-81.56	14-Jun-2008	BIO bus 2008	BIO
Raphia frater frater	3	PPBP-1443	KJ389506	CAN: ON: Bruce Peninsula N. P., Cyprus Lake info booth	45.19	-81.56	14-Jun-2008	BIO bus 2008	BIO
Raphia frater frater	3	PPBP-1440	KJ390013	CAN: ON: Bruce Peninsula N. P., Cyprus Lake info booth	45.19	-81.56	14-Jun-2008	BIO bus 2008	BIO
Raphia frater frater	3	PPBP-1446	KJ390985	CAN: ON: Bruce Peninsula N. P., Cyprus Lake info booth	45.19	-81.56	14-Jun-2008	BIO bus 2008	BIO
Raphia frater frater	3	PPBP-1447	KJ391657	CAN: ON: Bruce Peninsula N. P., Cyprus Lake info booth	45.19	-81.56	14-Jun-2008	BIO bus 2008	BIO
Raphia frater frater	3	PPBP-1429	KJ393549	CAN: ON: Bruce Peninsula N. P., Cyprus Lake info booth	45.19	-81.56	14-Jun-2008	BIO bus 2008	BIO
Raphia frater frater	3	PPBP-1442	KJ393981	CAN: ON: Bruce Peninsula N. P., Cyprus Lake info booth	45.19	-81.56	14-Jun-2008	BIO bus 2008	BIO
Raphia frater frater	3	PPBP-2091	KJ392381	CAN: ON: Grey Co., Fay Jensen Farm	44.38	-80.58	20-Jun-2008	J.Cossey et al.	BIO
Raphia frater frater	3	PPBP-0846	KJ388933	CAN: ON: Point Pelee N. P.	41.97	-82.53	06-Jun-2008	BIO bus 2008	BIO
Raphia f. frater / coloradensis	1	acrorev155	-	USA: OR: Baker Co., Brownlee	44.835	-116.881	12-Jun-1981	L. Crabo	CNC
Raphia f. frater / coloradensis	1	CNCNoctuoidea10114	-	USA: OR: Baker Co., Cornet Ck.	44.483	-117.85	12-Jul-2002	J. Troubridge	CNC
Raphia f. frater / coloradensis	1	acrorev159	-	USA: OR: Baker Co., Cornet Ck.	44.518	-117.862	30-Jun-2003	L. Crabo	CNC
Raphia frater frater	1	DH010805	KJ384843	CAN: QC: Pontiac dist., Chutes de Luskville	45.532	-75.994	10-Jun-2005	D. Handfield	DHC
Raphia frater frater	1	DH010756	KJ392306	CAN: QC: Pontiac dist., Chutes de Luskville	45.532	-75.994	10-Jun-2005	D. Handfield	DHC
Raphia frater frater	1	10BBCLP-1779	JF842769	CAN: SK: Prince Albert N. P., overflow cmpgd.	53.905	-106.074	15-Jun-2010	BIO bus 2010	BIO
Raphia frater frater	1	10BBCLP-1780	JF842770	CAN: SK: Prince Albert N. P., overflow cmpgd.	53.905	-106.074	15-Jun-2010	BIO bus 2010	BIO
Raphia frater frater	1	10BBCLP-1781	JF842771	CAN: SK: Prince Albert N. P., overflow cmpgd.	53.905	-106.074	15-Jun-2010	BIO bus 2010	BIO
Raphia frater frater	1	10BBCLP-1762	JF842752	CAN: SK: Prince Albert N. P., Sturgeon Crossing	53.73	-106.722	19-Jun-2010	BIO bus 2010	BIO
Raphia frater frater	1	10BBCLP-1778	JF842768	CAN: SK: Prince Albert N. P., Sturgeon Crossing	53.73	-106.722	19-Jun-2010	BIO bus 2010	BIO
Raphia frater frater	1	10BBCLP-1782	JF842772	CAN: SK: Prince Albert N. P., Sturgeon Crossing	53.73	-106.722	19-Jun-2010	BIO bus 2010	BIO
Raphia frater piazzi	1	acrorev196	-	USA: TX: San Patricio Co., Welder W. R., nr. Sinton	28.037	-97.509	15-Jun-1985	E. Knudson	CNC
Raphia frater piazzi	2	CNCNoctuoidea12277	-	USA: TX: Zavalla Co., Nueces River, Crystal City	28.6772	-99.8278	26-Feb-1993	E. Knudson	CNC
Raphia frater piazzi	2	acrorev195	-	USA: TX: Zavalla Co., Nueces River, Crystal City	28.677	-99.828	26-Mar-1993	E. Knudson	CNC
Raphia f. frater / coloradensis	1	acrorev154	-	USA: WA: Kittitas Co., Umtanum Ck.	46.88	-120.57	24-May-2001	L. Crabo	CNC
Raphia f. frater / coloradensis	1	acrorev156	-	USA: WA: Kittitas Co., Umtanum Ck.	46.88	-120.57	24-May-2001	L. Crabo	CNC
Raphia f. frater / coloradensis	1	acrorev157	-	USA: WA: Kittitas Co., Umtanum Ck.	46.88	-120.57	24-May-2001	L. Crabo	CNC
Raphia frater frater	1	acrorev160	-	USA: WA: Chelan Co., Derby Canyon	41.6	-120.5	03-Jul-2003	L. Crabo	CNC
Raphia frater frater	1	acrorev158	-	USA: WA: Pend Oreille Co., Harvey Ck.	48.767	-117.262	23-Jun-2004	L. Crabo	CNC
